# Supplementary material for: Alpha-l-Locked Nucleic Acid-Modified Antisense Oligonucleotides Induce Efficient Splice Modulation In Vitro
Source: PubMed Central journal article supplement (PMC7177859; doi:10.3390/ijms21072434), 2020-03-31
Supplement: ijms-21-02434-s001.pdf [file ijms-21-02434-s001.pdf]

# Supplementary Information

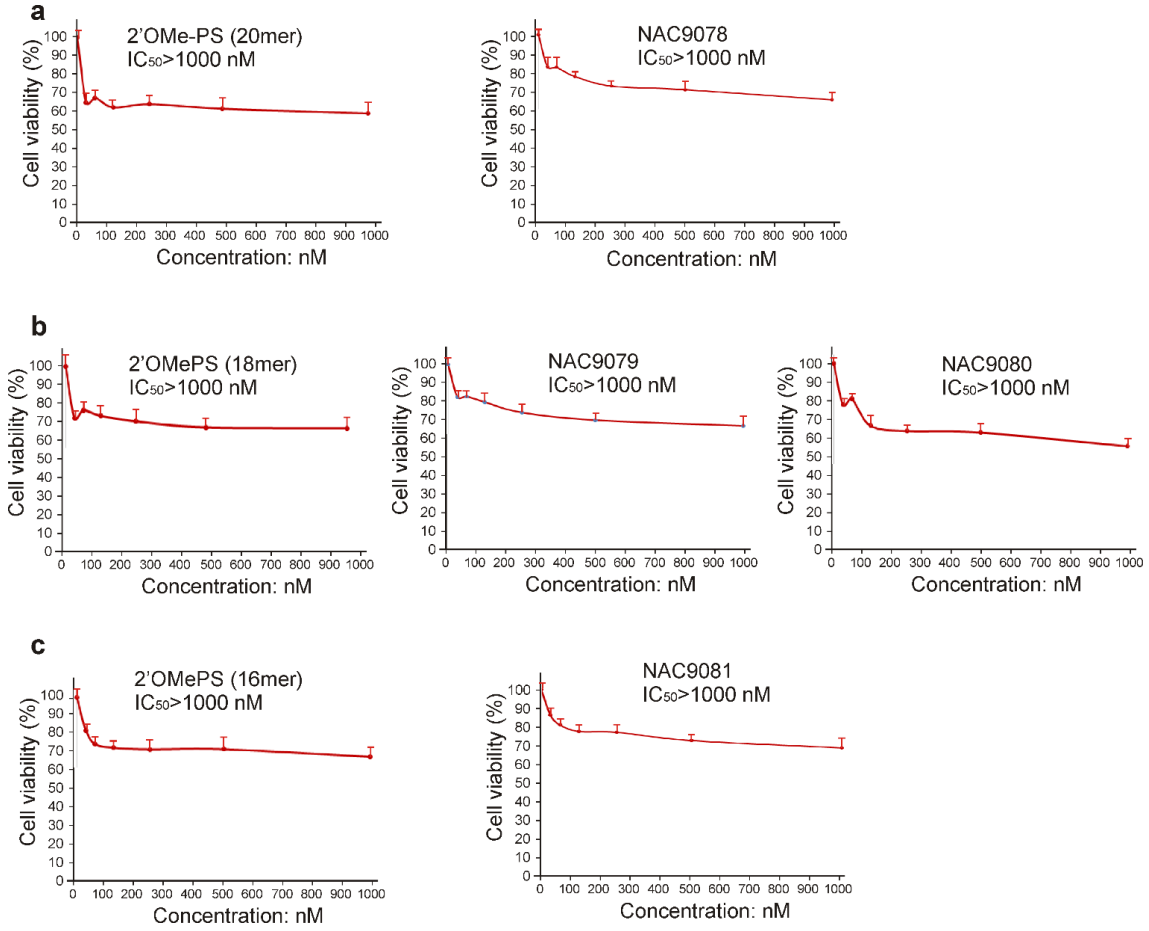

Figure S1. Evaluation of  $IC_{50}$  of the indicated compounds using mouse myoblasts.

## EC<sub>50</sub> of different compounds

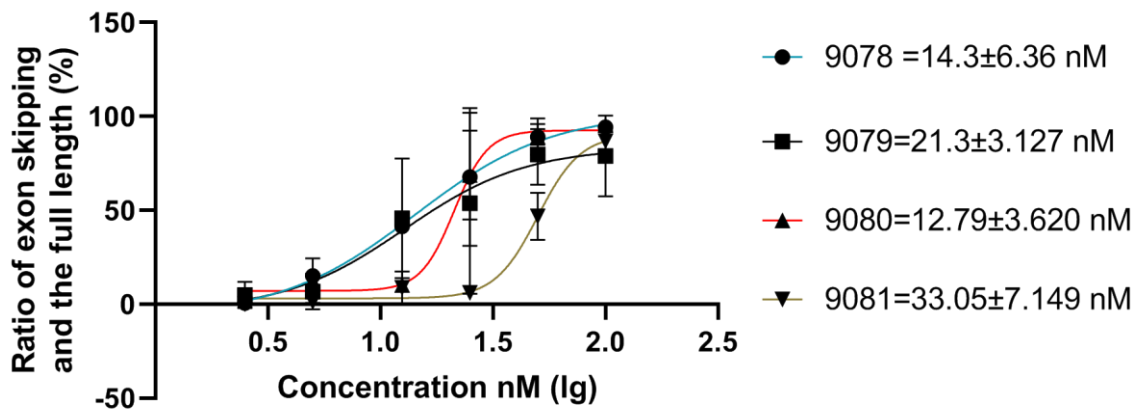

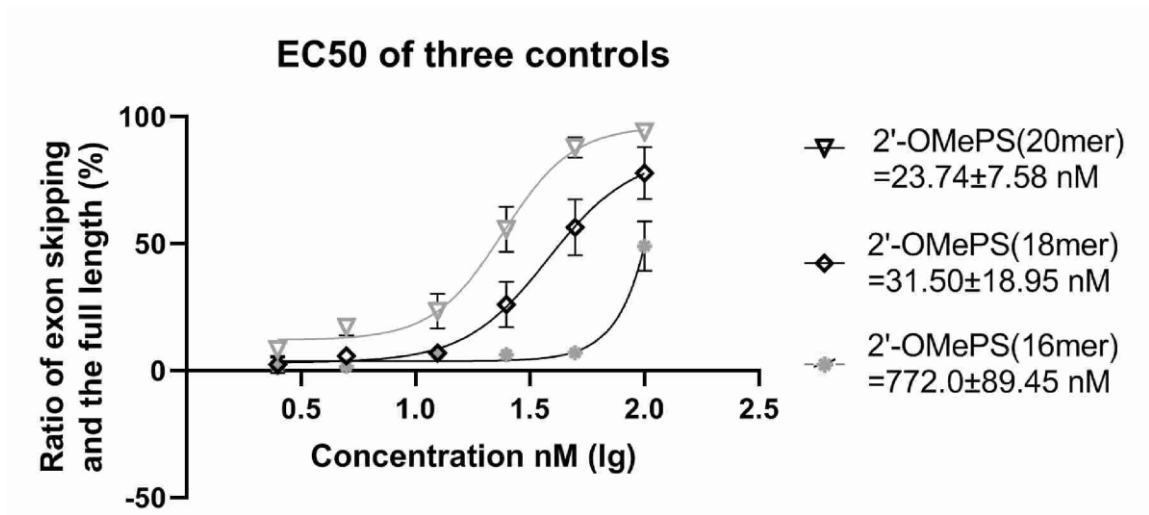

Figure S2. Evaluation of EC50 of the indicated compounds using mouse myoblasts.

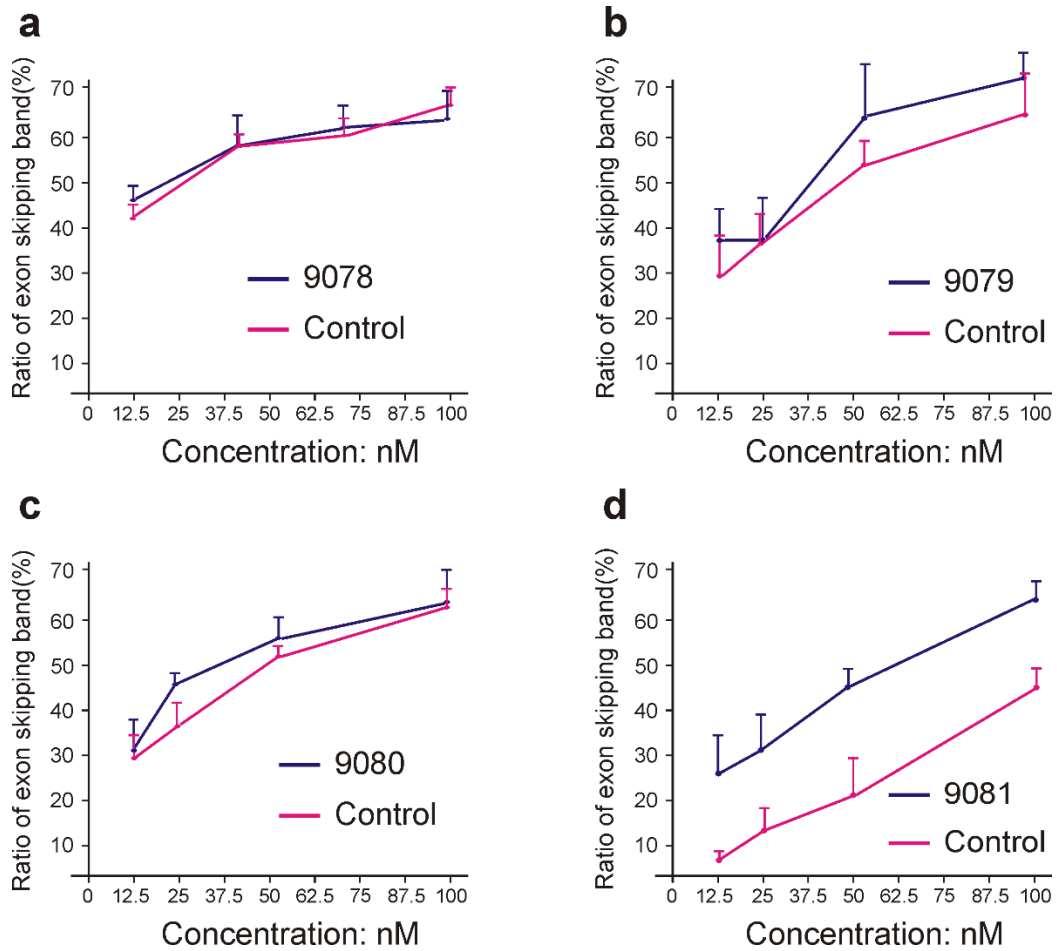

Figure S3. Graphs obtained after evaluation exon skipping efficiency of the control Vs the AOs using a two-factor variance analysis.
